# Supplementary material for: The Multifaceted Syndromic Primary Immunodeficiencies in Children
Source: Preprints.org preprint supplement (doi:10.20944/preprints202306.1547.v1), 2023-06-21
Supplement: Supplementary file 1 [file supplementary]

| Patient number | Diagnosis                                                                                                   | Immunosuppressive, antiinflammatory and biologic modifier therapy     | Indications                                                                                | Response |
|----------------|-------------------------------------------------------------------------------------------------------------|-----------------------------------------------------------------------|--------------------------------------------------------------------------------------------|----------|
| 5              | DiGeorge syndrome                                                                                           | rituximab, prednisolone, mycophenolate mofetil                        | Autoimmune thrombocytopenia, lymphopenia and neutropenia                                   | partial  |
| 6              | DiGeorge syndrome                                                                                           | bortezomib, rituximab, prednisolone, sirolimus, mycophenolate mofetil | Autoimmune haemolytic anaemia                                                              | partial  |
| 8              | DiGeorge syndrome                                                                                           | rituximab                                                             | EBV lymphoproliferative disease                                                            | good     |
| 9              | DiGeorge syndrome                                                                                           | prednisolone, cyclosporin, mycophenolate mofetil, tacrolimus          | Autoimmune haemolytic anaemia, thrombocytopenia and neutropaenia                           | poor     |
|                |                                                                                                             | prednisolone, cyclosporin, tacrolimus                                 | Autoimmune hepatitis                                                                       | poor     |
|                |                                                                                                             | prednisolone, rituximab, cyclophosphamide                             | EBV negative lambda light chain restricted polymorphic B cell lymphoproliferative disorder | good     |
| 10             | Trichohepatoenteric syndrome                                                                                | prednisolone, baricitinib, mycophenolate mofetil                      | Chronic diarrhoea, IBD-like histology                                                      | partial  |
| 11             | Trichohepatoenteric syndrome                                                                                | mycophenolate mofetil                                                 | Chronic diarrhoea                                                                          | partial  |
| 17             | Sideroblastic anaemia with B cell immunodeficiency, periodic fevers and developmental delay (SIFD syndrome) | anakinra, colchicine                                                  | Autoinflammation                                                                           | poor     |
|                | Sideroblastic anaemia with B cell immunodeficiency, periodic fevers and developmental delay (SIFD syndrome) | etanercept, colchicine                                                | Autoinflammation                                                                           | good     |
| 21             | Sideroblastic anaemia with B cell immunodeficiency, periodic fevers and developmental delay (SIFD syndrome) | anakinra                                                              | Autoinflammation                                                                           | good     |
| 30             | Sideroblastic anaemia with B cell immunodeficiency, periodic fevers and developmental delay (SIFD syndrome) | etanercept                                                            | Autoinflammation                                                                           | good     |
| 31             | Wiskott-Aldrich syndrome                                                                                    | prednisolone, rituximab                                               | Autoimmune thrombocytopenia                                                                | poor     |
