# Supplementary material for: The Multifaceted Syndromic Primary Immunodeficiencies in Children
Source: Preprints.org preprint supplement (doi:10.20944/preprints202306.1547.v1), 2023-06-21
Supplement: Supplementary file 3 [file supplementary]

| Patient | Genetic disorder                                                                                           | Age (years) | Sex    | Immunophenotypic abnormalities                                                                                                                                                                                                 | Infections                                                                                                                                                                                      | Non-infectious clinical features                                                                                                                                                                                                                                                                                                 | Immunoglobulin replacement | Antibiotic prophylaxis | Immunosuppressive therapy                                                                  | Other treatment   | Mortality | Cause of death                                                     |
|---------|------------------------------------------------------------------------------------------------------------|-------------|--------|--------------------------------------------------------------------------------------------------------------------------------------------------------------------------------------------------------------------------------|-------------------------------------------------------------------------------------------------------------------------------------------------------------------------------------------------|----------------------------------------------------------------------------------------------------------------------------------------------------------------------------------------------------------------------------------------------------------------------------------------------------------------------------------|----------------------------|------------------------|--------------------------------------------------------------------------------------------|-------------------|-----------|--------------------------------------------------------------------|
| 1       | Akaza telangiectasia                                                                                       | 16.3        | Female | Low T and B cells, low IgG, A and M.                                                                                                                                                                                           | Recurrent respiratory infections, ear infections, toe nail fungal infection.                                                                                                                    | Akasia, speech problem, mydriasis, eye telangiectasia, skin pruritus, thoracolumbar scoliosis, fatty liver, gastritis, gallbladder polyp, transaminitis, obesity, vitamin D deficiency, impaired glucose tolerance.                                                                                                              | Yes                        | Yes                    |                                                                                            |                   | No        |                                                                    |
| 2       | Akaza telangiectasia                                                                                       | 12.6        | Female | Low T and B cells, low IgG and A.                                                                                                                                                                                              | Recurrent respiratory infections, impetigo.                                                                                                                                                     | Transaminitis, mydriasis, fatty liver, slow learner, delayed motor skills, bulbar compressed telangiectasia, scoliosis.                                                                                                                                                                                                          | Yes                        | Yes                    |                                                                                            |                   | No        |                                                                    |
| 3       | Akaza telangiectasia                                                                                       | 20.3        | Male   | Low T cells, low IgG, A and M.                                                                                                                                                                                                 | Pneumonia, neutropenic sepsis.                                                                                                                                                                  | Right cerebral infection, cerebral venous thrombosis, calf muscle tightness, vitamin D deficiency, transaminitis, lymphoma.                                                                                                                                                                                                      | Yes                        | No                     | Chemotherapy                                                                               |                   | No        |                                                                    |
| 4       | Akaza telangiectasia                                                                                       | 22.9        | Male   | Low T and B cells, low IgG, A and M.                                                                                                                                                                                           | Pneumonia, sepsis.                                                                                                                                                                              | Acute necrosis of both legs, vitamin D deficiency, long QT syndrome, dystonia, thoracolumbar scoliosis, skin ataxia, myopia, lymphoma.                                                                                                                                                                                           | Yes                        | No                     | Chemotherapy                                                                               |                   | No        |                                                                    |
| 5       | DiGeorge syndrome                                                                                          | 12.8        | Male   | Low T, B and NK cells, raised double negative T cells, low IgG and G4, inadequate vaccine responses, autoimmune neutropenia, lymphopenia and thrombocytopenia, MBL deficiency, allergic reaction to penicillin and penicillin. | Bronchiectasis, recurrent respiratory infections, recurrent skin infections, subacute bacterial endocarditis, gastroenteritis, C difficile infection.                                           | Truncus arteriosus, ventricular septal defect, developmental delay, learning difficulty.                                                                                                                                                                                                                                         | Yes                        | Yes                    | Rituximab, prednisolone, mycophenolate mofetil                                             |                   | Yes       | NA                                                                 |
| 6       | DiGeorge syndrome                                                                                          | 13.3        | Male   | Severe combined immune deficiency, absent T cells, absent PHA responses, low IgG, A and M, autoimmune haemolytic anaemia, alopecia areata, autoimmune thrombocytopenia.                                                        | Oral candidiasis, recurrent respiratory infection, C difficile infection, sapovirus, adenovirus and norovirus gastrointestinal infection, enterovirus infection, parvovirus.                    | Hypoparathyroidism, femoral fracture, scoliosis, gene vilgum, raised alanine transaminase, hepatomegaly, iron overload due to frequent transfusion, myopic astigmatism, osteopenia, areolar developmental delay, tetralogy of fallot, pulmonary artery stenosis, urinary calculus, developmental delay.                          | Yes                        | Yes                    | Bortezomib, Rituximab, prednisolone, sirolimus, mycophenolate mofetil                      | Thymic transplant | No        |                                                                    |
| 7       | DiGeorge syndrome                                                                                          | 21.9        | Female | Low B cells, IgG, A and M, poor vaccine responses, autoimmune cytopaenias (neutrophil, platelet, anaemia), EBV driven T and B lymphoproliferative disease.                                                                     | Bronchiectasis.                                                                                                                                                                                 | Cleft palate, pulmonary stenosis, ventricular septal defect, learning difficulty, ADHD, primary nocturnal enuresis, vertigo, thoracic scoliosis, autoimmune hypothyroidism, developmental delay.                                                                                                                                 | Yes                        | Yes                    |                                                                                            |                   | No        |                                                                    |
| 8       | DiGeorge syndrome                                                                                          | 21.4        | Male   | Low B cells, IgG, A and M, poor vaccine responses, autoimmune cytopaenias (neutrophil, platelet, anaemia), EBV driven T and B lymphoproliferative disease.                                                                     | Bronchiectasis, otitis externa.                                                                                                                                                                 | Cleft palate, iron deficiency anaemia, speech delay, learning difficulties, developmental delay.                                                                                                                                                                                                                                 | Yes                        | Yes                    | Rituximab                                                                                  |                   | No        |                                                                    |
| 9       | DiGeorge syndrome                                                                                          | 23.0        | Female | Autoimmune haemolytic anaemia and thrombocytopenia, autoimmune hepatitis, polymorphic duct lymphoproliferative disease, low B cells, IgG and M (following lymphoproliferative disease treatment).                              | Grain infection, otitis media, cellulitis.                                                                                                                                                      | Interrupted aortic arch, ventricular septal defect, tricuspid regurgitation, bicuspid aortic valve, cleft palate, lymphangitis, liver fibrosis, learning difficulties, allergic rhinitis.                                                                                                                                        | Yes                        | Yes                    | Prednisolone, mycophenolate mofetil, cyclosporin, tacrolimus, Rituximab, cyclophosphamide. |                   | No        |                                                                    |
| 10      | Trichophaga telangiectasia                                                                                 | 5.1         | Male   | Poor vaccine responses, interferonopathy.                                                                                                                                                                                      | Recurrent respiratory infections.                                                                                                                                                               | Cerebral perforation, inflammatory bowel disease, chronic diarrhoea, recurrent fracture, visual impairment, patent ductus arteriosus, developmental delay, horseshoe kidney, scalp eczema, right exotropia, hernia, renal tubular acidosis, vitamin D deficiency, hepatomegaly, congenital jaundice.                             | Yes                        | No                     | Prednisolone, baricitinib, mycophenolate mofetil                                           |                   | No        |                                                                    |
| 11      | Trichophaga telangiectasia                                                                                 | 17.5        | Male   | Low B cells, low IgG, A and M, poor vaccine responses.                                                                                                                                                                         | Recurrent ear infections, recurrent respiratory infections, skin infection, conjunctivitis.                                                                                                     | Mouth ulcers, chronic diarrhoea, nocturnal enuresis, pancreatitis, joint pain and hypermobility, eczema, splenomegaly.                                                                                                                                                                                                           | Yes                        | Yes                    | Mycophenolate mofetil                                                                      |                   | No        |                                                                    |
| 12      | Noonan syndrome                                                                                            | 13.4        | Male   | Low IgG, absent MBL, common variable immune deficiency.                                                                                                                                                                        | Recurrent respiratory infections, urinary tract infection.                                                                                                                                      | Primary amenorrhea, long QT syndrome, neurobehavioural problem, asthma, allergic rhinitis, type 1 diabetes mellitus, sleep problem, arthralgia, easy bruising, dyspraxia, sensory processing disorder, autism, learning difficulties, cleft au fat spots, multiple drug allergy, cyclical neutropenia.                           | Yes                        | Yes                    |                                                                                            |                   | No        |                                                                    |
| 13      | Trisomy 22                                                                                                 | 15.8        | Male   | Low T cells, low IgG, poor vaccine response.                                                                                                                                                                                   | Recurrent respiratory infections, recurrent urinary tract infections.                                                                                                                           | Cleft lung hypoplasia, imperforate anus, asplenia, total anomalous pulmonary venous drainage, pulmonary stenosis, left atrial isomerism, gut malrotation, megacolonitis, ureteric dilatation, hypertension, ADHD, asthma.                                                                                                        | Yes                        | Yes                    |                                                                                            |                   | No        |                                                                    |
| 14      | Trichophaga telangiectasia/ Cockayne syndrome complex                                                      | 8.6         | Female | Low IgG, intermittent neutropenia.                                                                                                                                                                                             | Recurrent respiratory infections, adenovirus gastroenteritis, Enterococcus urinary tract infection.                                                                                             | Trichophaga telangiectasia, ichthyosis, myopia, exotropia, microphthalmia, horizontal nystagmus, cataract, delayed brain maturation, developmental delay, myoclonic movements, photosensitivity, osteosclerosis, raised alanine transaminase, lymphitis.                                                                         | Yes                        | Yes                    |                                                                                            |                   | No        |                                                                    |
| 15      | Myhre syndrome                                                                                             | 11.8        | Male   | Low IgG.                                                                                                                                                                                                                       | Recurrent respiratory infections, recurrent severe norovirus infection, purulent rhinitis, scalp fungal infection, conjunctivitis, dental abscess.                                              | ADHD, global developmental delay, stiff joints, thumb deformity, sleep problem, coarctation of aorta, precocious puberty, vitamin D deficiency.                                                                                                                                                                                  | Yes                        | Yes                    |                                                                                            |                   | No        |                                                                    |
| 16      | Arfoides Tham syndrome                                                                                     | 13.0        | Female | T cell lymphopenia, low IgG, MBL deficiency, intermittent neutropenia, poor vaccine response.                                                                                                                                  | Recurrent/persistent wet cough & respiratory infections, otitis media, mastoiditis, recurrent urinary tract infections.                                                                         | ADHD, learning difficulty, diarrhoea, constipation, sleep problem, recurrent seizures, long QT syndrome, hypermobility, conductive hearing loss, myopia, vitamin B deficiency, humeral fracture, incoordination, myelochondrial cytopathy, swallowing problem, developmental delay, motor difficulties.                          | Yes                        | No                     |                                                                                            |                   | No        |                                                                    |
| 17      | Sideroblastic anaemia with B cell immunodeficiency, periodic fevers and developmental delay (SFD syndrome) | 4.9         | Male   | Low B cells, low IgG, A and M.                                                                                                                                                                                                 | HHV8 viraemia, sepsis, skin and soft tissue infection.                                                                                                                                          | Anaemia, splenomegaly, eczema, arthritis, chronic diarrhoea, hepatitis, developmental delay, refractive error, dacrylitis, raised amyloid, thrombocytosis.                                                                                                                                                                       | Yes                        | No                     | Anakinra, etanercept                                                                       |                   | No        |                                                                    |
| 18      | Supernumerary ring chromosome 10 syndrome                                                                  | 2.0         | Male   | T cell dysfunction, failure of T cell proliferation to mitogens, low CD8 and naive T cells, absent S cells, high NK cells, absent IgG, A and M, thrombocytopenia.                                                              | Recurrent respiratory infections, sapovirus, rotavirus infection, MRSA colonization, fungal urinary tract infection, E. coli sepsis.                                                            | Ecema, failure to thrive, congenital hypothyroidism, bilateral developmental dysplastic hips, bilateral small kidneys, pancreatic insufficiency, dermatitis, developmental delay, microphthalmia, bilateral cryptorchidism, raised alanine transaminase, gastroesophageal reflux disease, recurrent diarrhoea, thrombocytopenia. | Yes                        | Yes                    |                                                                                            |                   | Yes       | NA                                                                 |
| 19      | Kabuki syndrome                                                                                            | 22.8        | Female | Low IgG, undetectable IgM, thrombocytopenia.                                                                                                                                                                                   | Bronchiectasis, recurrent respiratory infections, chronic glue ear, urinary tract infection, severe chicken pox, shingles.                                                                      | Scoliosis, learning difficulty, horseshoe kidney, hyperostosis, cystic liver with transaminitis, short stature, cleft palate, thrombocytopenia.                                                                                                                                                                                  | Yes                        | Yes                    |                                                                                            |                   | No        |                                                                    |
| 20      | Cartilage Hair Hypoplasia                                                                                  | 15.3        | Male   | T cell cytopenia, y6 T cell expansion, very low TRECs, absent PHA response, anaemia.                                                                                                                                           | Bronchiectasis, oral/bonophagal candidiasis, otitis media, shingles, norovirus gastroenteritis.                                                                                                 | Fatty liver, hypocalcaemia, chronic diarrhoea, biliary destruction, malabsorption, iron deficiency anaemia, subcutaneous granulomatous, arthralgia, sleep disorder, short stature, uveitis, intussusception.                                                                                                                     | Yes                        | Yes                    |                                                                                            |                   | No        | Pneumonia                                                          |
| 21      | Sideroblastic anaemia with B cell immunodeficiency, periodic fevers and developmental delay (SFD syndrome) | 1.6         | Female | Absent B cells, agammaglobulinemia, severe anaemia, recurrent red cell transfusion.                                                                                                                                            | Norovirus gastroenteritis, E. faecium sepsis, norovirus pneumonitis.                                                                                                                            | Chronic diarrhoea, pulmonary hypertension, distal renal tubular acidosis, developmental delay, anaemia.                                                                                                                                                                                                                          | Yes                        | Yes                    | Anakinra                                                                                   | HSC               | Yes       | Norovirus infection, global encephalitis with widespread infection |
| 22      | Rothman syndrome                                                                                           | 6.6         | Female | Low B cells, low IgG, A and M.                                                                                                                                                                                                 | Ecema herpeticum, shingles, norovirus gastroenteritis.                                                                                                                                          | Cow's milk protein intolerance, eczema herpeticum, intrauterine growth retardation, dacrylitis, developmental delay, right hemiplegia, hypermobility, acute disseminated encephalomyelitis.                                                                                                                                      | Yes                        | No                     |                                                                                            |                   | No        |                                                                    |
| 23      | Chromosome 2p36.3 deletion                                                                                 | 8.2         | Male   | Low IgG.                                                                                                                                                                                                                       | Recurrent respiratory and skin infections.                                                                                                                                                      | Tourette syndrome, Asperger syndrome, mouth ulcers, motor and sensory difficulties.                                                                                                                                                                                                                                              | No                         | Yes                    |                                                                                            |                   | No        |                                                                    |
| 24      | Wiskott-Aldrich syndrome                                                                                   | 21.8        | Male   | Low IgG, thrombocytopenia.                                                                                                                                                                                                     | Norovirus gastroenteritis, severe chicken pox, pinna cellulitis and pre-auricular abscess, chronic cough, pneumonia, S. aureus central ear abscess.                                             | Recurrent scleritis, splenomegaly, allergic rhinitis and eczema, recurrent arthralgia, thrombocytopenia, glomerulonephritis.                                                                                                                                                                                                     | Yes                        | Yes                    | Lentiviral gene therapy                                                                    |                   | No        |                                                                    |
| 25      | Wiskott-Aldrich syndrome                                                                                   | 5.7         | Male   | Low IgG, thrombocytopenia.                                                                                                                                                                                                     | Recurrent respiratory infections, norovirus and sapovirus gastroenteritis, otitis media and externa, adenovirus, chicken pox, corditis cap, oral thrush, conjunctivitis.                        | Charcot-Marie-Tooth syndrome (asymptomatic), hepatitis, eczema, chronic diarrhoea, and ulcer, speech delay, cow's milk protein allergy, thrombocytopenia.                                                                                                                                                                        | Yes                        | Yes                    | HSC (complicated by grade 3 GVHD)                                                          |                   | No        |                                                                    |
| 26      | Wiskott-Aldrich syndrome                                                                                   | 3.1         | Male   | Low IgG, autoimmune thrombocytopenia.                                                                                                                                                                                          | EBV viraemia, E. coli and Enterococcus central line sepsis, C difficile infection.                                                                                                              | Ecema, anaemia.                                                                                                                                                                                                                                                                                                                  | Yes                        | Yes                    | HSC                                                                                        |                   | No        |                                                                    |
| 27      | Hyper IgE syndrome (STAT3 deficiency)                                                                      | 27.0        | Female | Low IgA, poor vaccine responses, reduced Th17, raised IgE, reduced CD4HL17 and CD4HL17.                                                                                                                                        | Recurrent respiratory infections, skin and soft tissue infections and abscesses, otitis media and externa, orbital cellulitis, dental infection, mediastinal abscess, otitis myringoid abscess. | Paratracheal air cyst/diaphragmatic, pathological fracture, retention of deciduous teeth, pulmonary embolism and internal jugular thrombosis.                                                                                                                                                                                    | Yes                        | Yes                    |                                                                                            |                   | No        |                                                                    |
| 28      | Hyper IgE syndrome (STAT3 deficiency)                                                                      | 25.0        | Female | Low IgA.                                                                                                                                                                                                                       | MRSA recurrent skin and soft tissue infection and abscesses, fungal nail infection, recurrent otitis.                                                                                           | Ecema, scoliosis, joint hypermobility, retained primary teeth, fractures, ostheitis.                                                                                                                                                                                                                                             | Yes                        | Yes                    |                                                                                            |                   | No        |                                                                    |
| 29      | Hyper IgE syndrome (STAT3 deficiency)                                                                      | 24.0        | Male   | IgE >5000 kU/L.                                                                                                                                                                                                                | Recurrent otitis media infections, corditis cap, S. aureus skin and soft tissue infection and abscess.                                                                                          | Fracture, hypermobility, dermatitis/eczema, chronic rhinitis, osteopenia, constipation, hypotonia, delayed motor milestones.                                                                                                                                                                                                     | Yes                        | Yes                    |                                                                                            |                   | No        |                                                                    |
| 30      | Sideroblastic anaemia with B cell immunodeficiency, periodic fevers and developmental delay (SFD syndrome) | 1.3         | Male   | Low B cells and low IgG.                                                                                                                                                                                                       | S. epidermidis central line infection.                                                                                                                                                          | Proximal renal tubulopathy, dilated pulmonary artery and aortic root with small ventricular septal defect, carnitine deficiency, chronic diarrhoea, pancreatic insufficiency, meconium ileus, developmental delay.                                                                                                               | Yes                        | No                     | Etanercept                                                                                 |                   | Yes       | Covid-19, cerebral edema                                           |
| 31      | Wiskott-Aldrich syndrome                                                                                   | 2.8         | Male   | Normal immunology. Persistent and profound thrombocytopenia - probable autoimmune thrombocytopenia (some increase in platelet count after steroid treatment, and HIV; rapid loss of platelets following platelet transfusion). |                                                                                                                                                                                                 | Ecema, thrombocytopenia.                                                                                                                                                                                                                                                                                                         | No                         | No                     | Rituximab, prednisolone.                                                                   |                   | No        |                                                                    |
| 32      | Hyper IgE syndrome (STAT3 deficiency)                                                                      | 17.0        | Female | IgE >2000 kU/L.                                                                                                                                                                                                                | Recurrent unopulmonary infections, skin infections and abscesses, otitis media, lymphadenitis, lung abscess and empyema.                                                                        | Pathological fractures, thoracic lumbar scoliosis, joint laxity, follicular hyperkeratosis/acrokeratosis pilaris, eczema.                                                                                                                                                                                                        | No                         | No                     |                                                                                            |                   | No        |                                                                    |
| 33      | MRK22 syndrome                                                                                             | 16.8        | Male   | Low B cells, low IgG, suboptimal vaccine responses.                                                                                                                                                                            | Persistent wet cough.                                                                                                                                                                           | Intrauterine growth restriction, glomerulonephritis, ambiguous genitalia, developmental delay, gastroesophageal reflux, got dysmimotony.                                                                                                                                                                                         | No                         | Yes                    |                                                                                            |                   | No        |                                                                    |
| 34      | Kabuki syndrome                                                                                            | 9.2         | Female | Low IgA.                                                                                                                                                                                                                       | Pyelonephritis, otitis media and recurrent otitis and respiratory infections.                                                                                                                   | Dysplastic kidneys, chronic kidney disease, hypertension, global developmental delay, bilateral dysplastic hips, joint hypermobility.                                                                                                                                                                                            | No                         | No                     |                                                                                            |                   | No        |                                                                    |
| 35      | Kabuki syndrome                                                                                            | 6.6         | Female | Slightly reduced CD8 and B cells, low IgG.                                                                                                                                                                                     | Pneumonia.                                                                                                                                                                                      | Complex congenital heart disease, developmental delay, developmental dysplasia of the hip, congenital hypothyroidism.                                                                                                                                                                                                            | No                         | No                     |                                                                                            |                   | No        |                                                                    |
| 36      | Rothman syndrome                                                                                           | 8.0         | Male   | Low B cells, reduced T cell proliferation to PHA/Concanavalin, low IgG, A and M, poor vaccine response (Diphtheria, Tetanus, Measles, Mumps).                                                                                  | Severe RSV pneumonia, enterovirus meningitis, recurrent respiratory infections, candidiasis.                                                                                                    | Hypothyroidism, developmental delay, tracheobronchomalacia, paronychia, syndactyl/phalangial dysplasia, hypermetriosis, mydriasis, ventriculomegaly.                                                                                                                                                                             | Yes                        | No                     |                                                                                            |                   | No        |                                                                    |

#### ABBREVIATIONS

ADHD Attention deficit hyperactivity disorder  
EBV Epstein-Barr virus  
GVHD graft versus host disease  
HHV Human herpesvirus  
HCT Haematopoietic stem cell transplantation  
Ig immunoglobulin  
intereven immunoglobulin  
MBL mannose binding lectin  
NA not available  
PHA phytohemagglutinin  
PMA Phorbol myristate acetate  
RSV Respiratory syncytial virus  
TREC T cell receptor excision circles
